# Supplementary material for: Tuning the performance of zinc hexacyanoferrate cathodes via ferrocyanide/ferricyanide precursor selection for high-efficiency zinc-ion storage
Source: Royal Society of Chemistry journal article supplement (doi:10.1039/d5cc06845b), 2025-12-31
Supplement: d5cc06845b1.pdf [file d5cc06845b1.pdf]

## Supporting Information

### **Tuning the Performance of Zinc Hexacyanoferrate Cathodes via Ferrocyanide/Ferricyanide Precursor Selection for High- Efficiency Zinc-Ion Storage**

Jiayao Wang,<sup>a</sup> Zewei Hu,<sup>a</sup> Qingqing Zheng,<sup>a</sup> Xin Wang,<sup>a</sup> Haiying Lu,<sup>a</sup> Yuju Qi,<sup>a</sup>  
Fuliang Chen,<sup>a</sup> Chao Han,<sup>b</sup> Chandrasekar M Subramaniam,<sup>c</sup> Weijie Li<sup>\*a</sup>

# 1. Experimental Section

## Materials Synthesis:

All materials in this work are of analytical grade and have not undergone further purification.  $K_3$  was prepared by a co-precipitation method at room temperature. Typically, Solution A was made by dissolving 3 mmol  $ZnSO_4 \cdot H_2O$  in 20 mL deionized water. Solution B was made by dissolving 2 mmol  $K_3Fe(CN)_6$  in 20 mL deionized water. Then, solution A was added dropwise to solution B water under constant stirring. After stirring at room temperature for 4 hours, the precipitate was centrifuged with deionized water and anhydrous ethanol and then vacuum-dried at 80 °C for 12 hours. The synthesis of  $Na_4$  and  $K_4$  followed the same procedure as that of  $K_3$ , except that  $K_3Fe(CN)_6$  was replaced by equal amounts of  $Na_4Fe(CN)_6$  and  $K_4Fe(CN)_6$ .

## Material Characterization:

X-ray diffraction (XRD) was performed using a Bruker D8 (Cu  $K\alpha$  radiation). Water content was determined by Thermogravimetric analysis (TG 209 F1 Libra), while the element composition was obtained by ICP-OES (SPECTRO BLUE). The microstructure was examined via Scanning electron microscopy (SEM, JEOL JSM-7100F) with an energy dispersive X-ray spectrometer (EDS). The valence states were analyzed by X-ray photoelectron spectroscopy (XPS) with a Thermo Fisher Scientific Escalab 250 Xi. The Raman spectra were collected from a Raman spectrometer (Renishaw in Via) using an excitation wavelength of 532 nm.

## Electrochemical Measurements:

The working electrode was composed of 70 wt% active materials ( $K_3$ ,  $Na_4$ ,  $K_4$ ), 20 wt% Ketjen black and 10 wt% polytetrafluoroethylene. The mixture was ground for 30 minutes to form a suitable consistency slurry. The slurry was evenly applied onto a 10 mm-diameter circular graphite foil and then dried under vacuum at 80 °C for 12 hours. A zinc foil was used as anode. The electrolyte for electrochemical performance test was 3 M  $Zn(CF_3SO_3)_2$ . The CR2032 coin-type battery was manufactured by assembling the electrodes, separator, and electrolyte in the air environment. All

assembled cells were left to stand for 6 h before testing. A Neware battery test system (CT-4008Tn-5V10mA-HWX, Shenzhen, China) was used to evaluate the electrochemical performance of the cells. Galvanostatic charge/discharge (GCD) measurements were carried out within the voltage range of 0.7~1.9 V (vs.  $\text{Zn}^{2+}/\text{Zn}$ ). For anode-less battery, zinc-deposited copper was used as the anode, with a deposition current of 1 mA/cm<sup>2</sup>. Cyclic voltammetry (CV) and electrochemical impedance spectroscopy (EIS) were conducted using a Gamry Interface 1010E electrochemical workstation. The frequency range of EIS was 0.01 Hz to 100000 Hz. The galvanostatic intermittent titration technique (GITT) testing was conducted at a specific current of 20 mA g<sup>-1</sup>, in which the cell was alternately charged/discharged for 600 s followed by 3600 s of rest. The  $\text{Zn}^{2+}$  diffusion coefficient can be calculated using the equation: 
$$D = \frac{4}{\pi\tau} \left( \frac{m_B V_M}{M_B S} \right)^2 \left( \frac{\Delta E_s}{\Delta E_t} \right)^2$$
, where  $m_B$ ,  $V_M$ , and  $M_B$  represent the mass, molar volume, and molar mass of the active materials;  $\tau$  is the testing time in each step;  $S$  is the electrode contact area;  $\Delta E_s$  is the voltage change before and after the titration; and  $\Delta E_t$  is the voltage change during the titration.

Computational method:

Density functional theory (DFT) calculations were performed using the Vienna Ab initio Simulation Package (VASP), which employs a plane-wave basis set and the projector augmented wave (PAW) method. The Perdew-Burke-Ernzerhof (PBE) exchange-correlation functional within the generalized gradient approximation (GGA) was used. Atomic positions were fully relaxed until the forces on all atoms were below 0.05 eV/Å, with an electronic iteration convergence criterion of 10<sup>-5</sup> eV. The plane-wave kinetic energy cutoff was set to 520 eV. Brillouin zone integrations were performed using a Gamma-centered k-points mesh with density of about 0.03 Å<sup>-1</sup>. The diffusion barriers were calculated using the climbing image nudged elastic band (CI-NEB) method.

## 2. Supplementary Figures

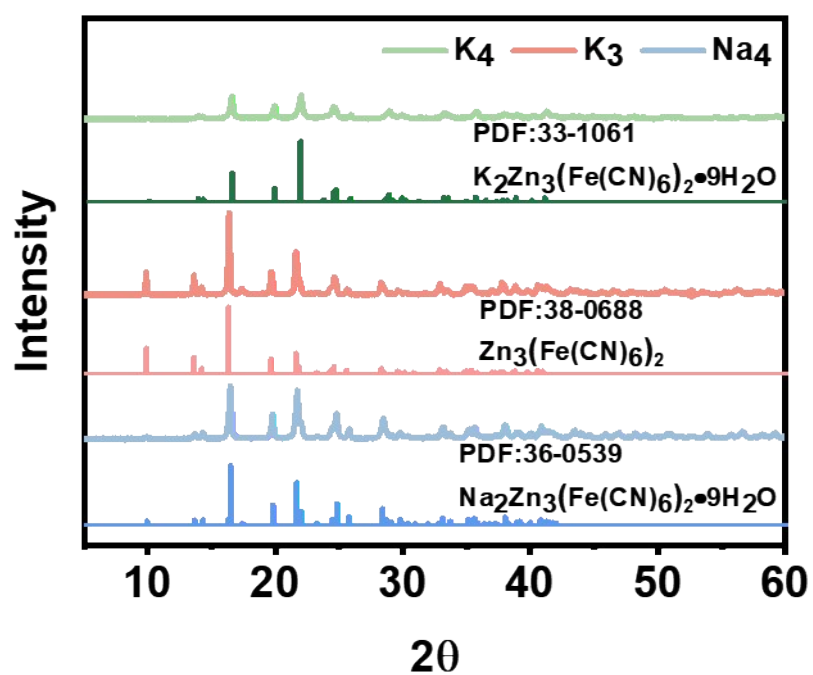

Figure S1. XRD pattern of Na<sub>4</sub>, K<sub>3</sub>, and K<sub>4</sub>.

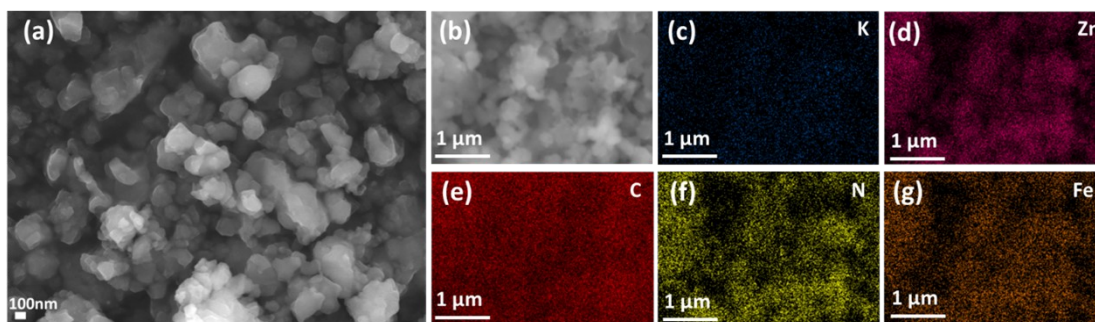

Figure S2. SEM images of  $K_3$  and corresponding elemental mapping images.

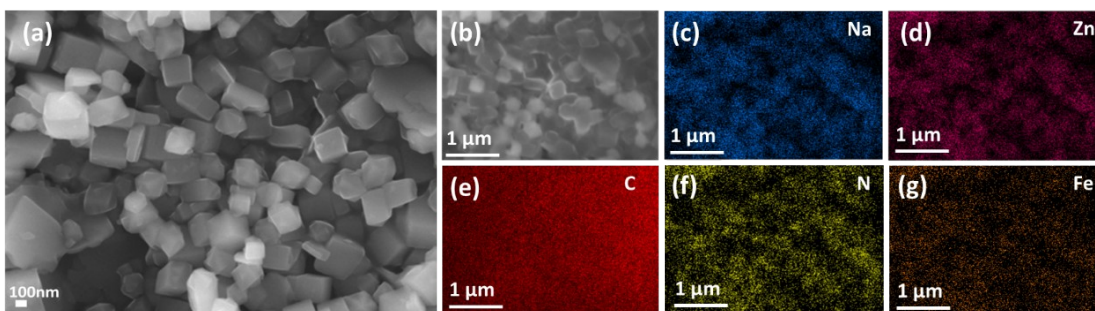

Figure S3. SEM images of  $Na_4$  and corresponding elemental mapping images.

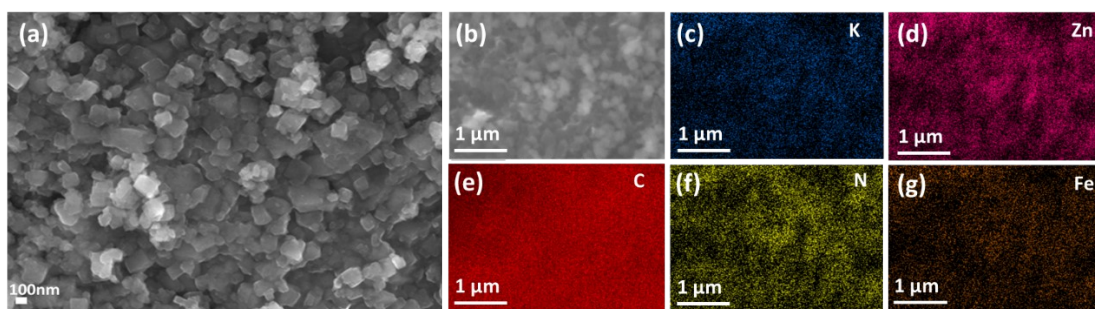

Figure S4. SEM images of  $K_4$  and corresponding elemental mapping images.

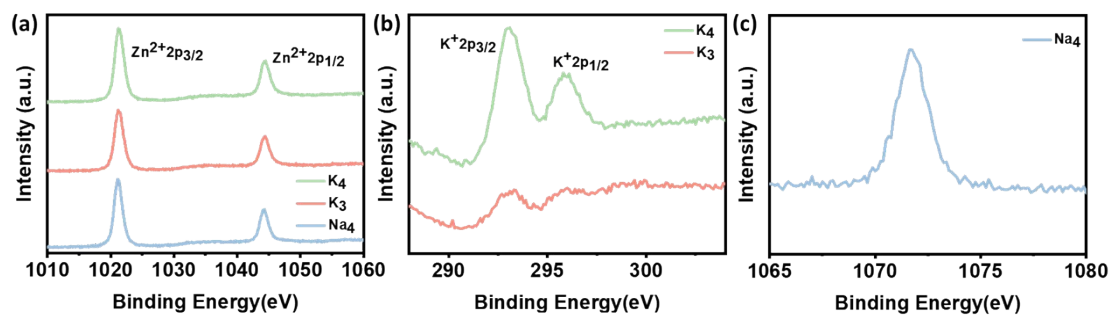

Figure S5. (a) Zn 2p XPS spectra of Na<sub>4</sub>, K<sub>3</sub>, and K<sub>4</sub>. (b) K 2p XPS spectra of K<sub>3</sub> and K<sub>4</sub>. (c) Na 1s XPS spectra of Na<sub>4</sub>.



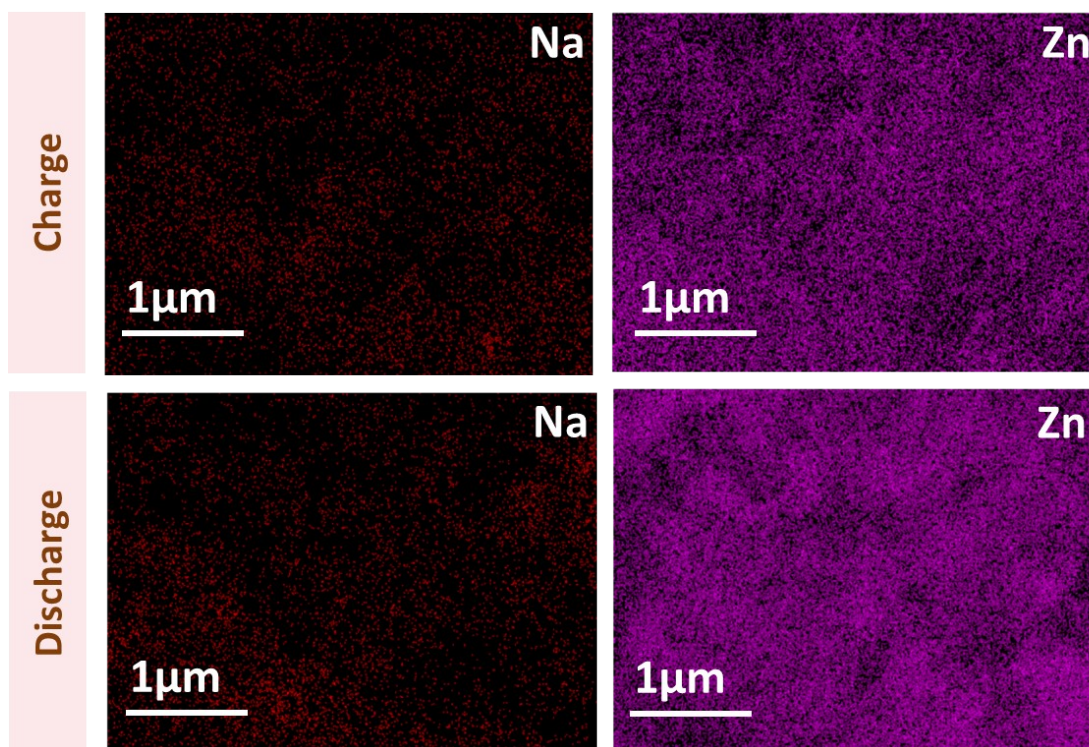

Figure S6. Elemental mapping images of  $\text{Na}_4$  under the states of first-cycle charge and first-cycle charge-discharge.

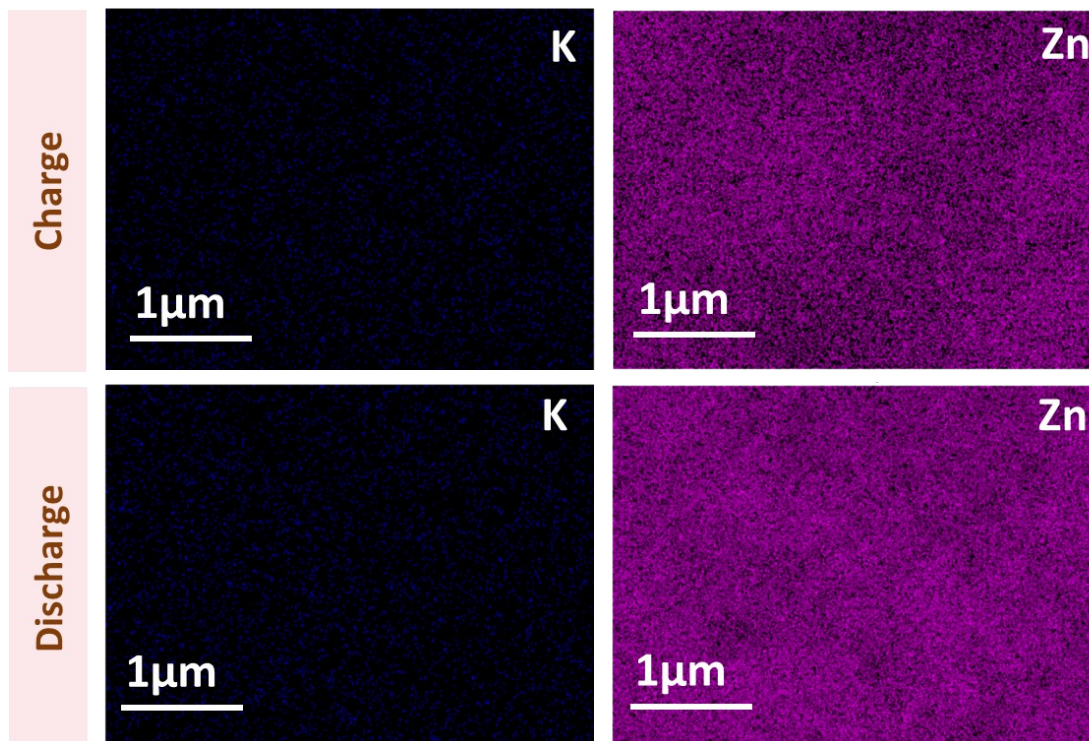

Figure S7. Elemental mapping images of  $\text{K}_4$  under the states of first-cycle charge and first-cycle charge-discharge.

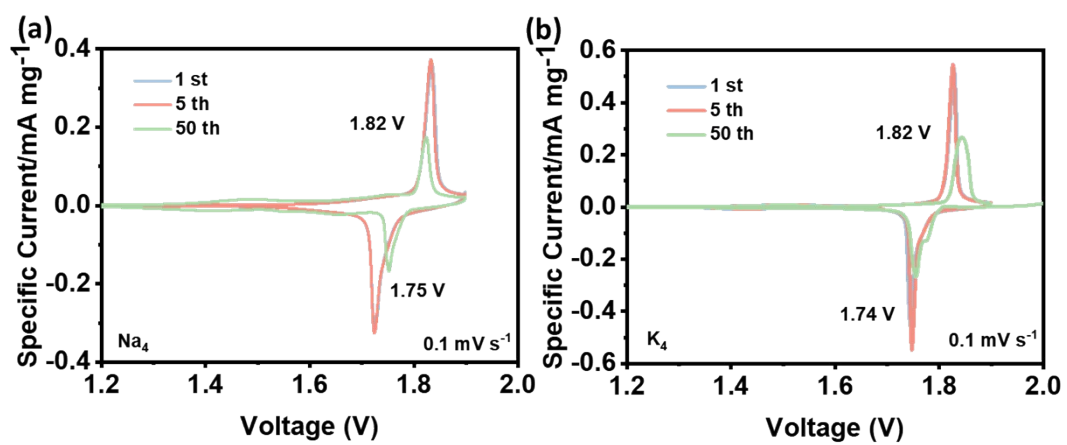

Figure S8. CV curves of (a) Na<sub>4</sub> and (b) K<sub>4</sub>.



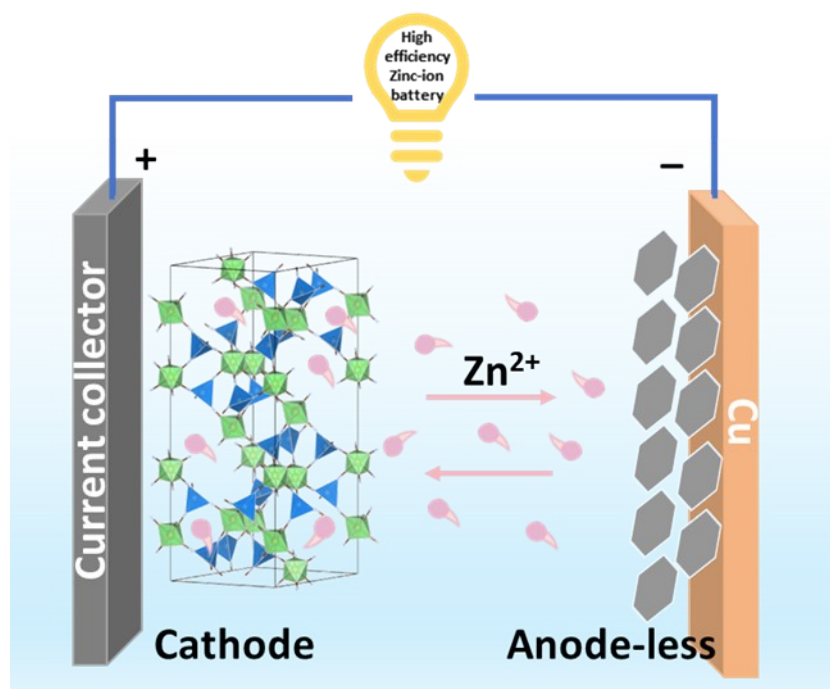

Figure S9. Schematic illustration of the Anode-less battery.

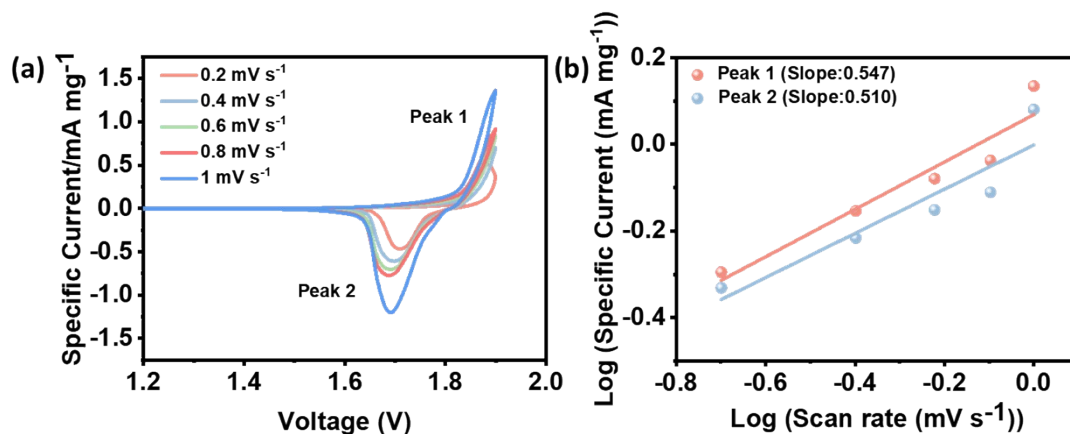

Figure S10. (a) CV curves at different scan rates from 0.2 to 1  $\text{mV s}^{-1}$  of  $\text{Na}_4$  and (b) the corresponding linear fitting of  $\log(i)$  and  $\log(v)$  plots.

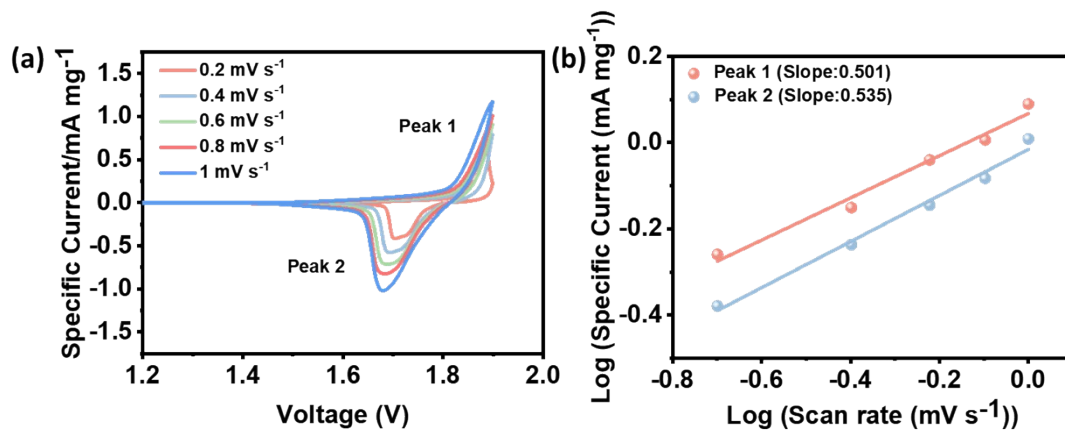

Figure S11. (a) CV curves at different scan rates from 0.2 to 1  $\text{mV s}^{-1}$  of  $\text{K}_4$  and (b) the corresponding linear fitting of  $\log(i)$  and  $\log(v)$  plots.

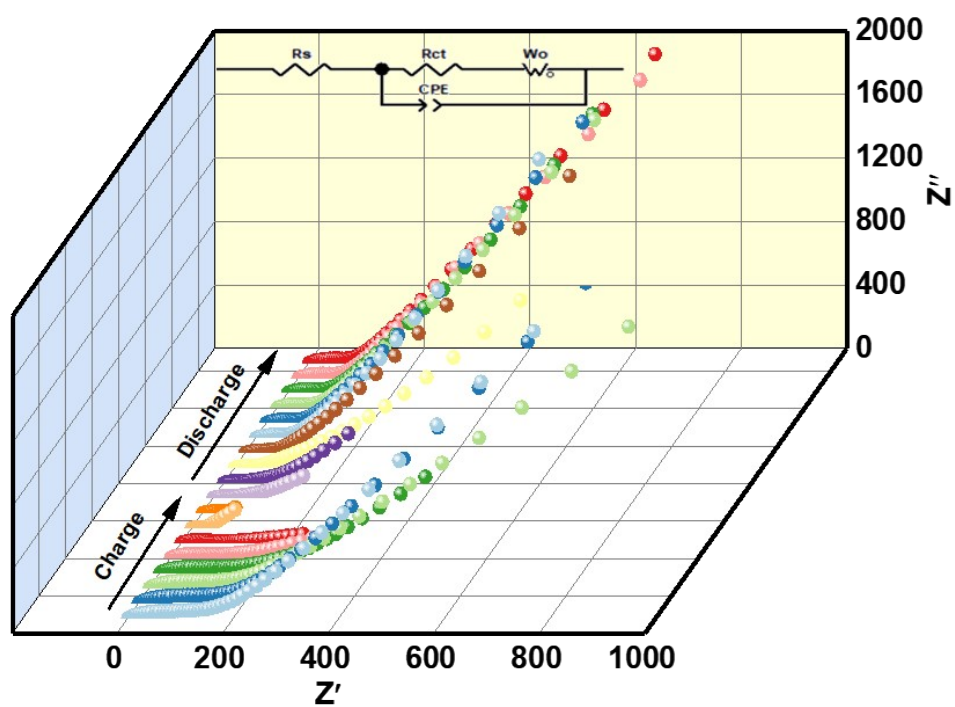

Figure S12. In-situ EIS curves of  $\text{Na}_4$ .

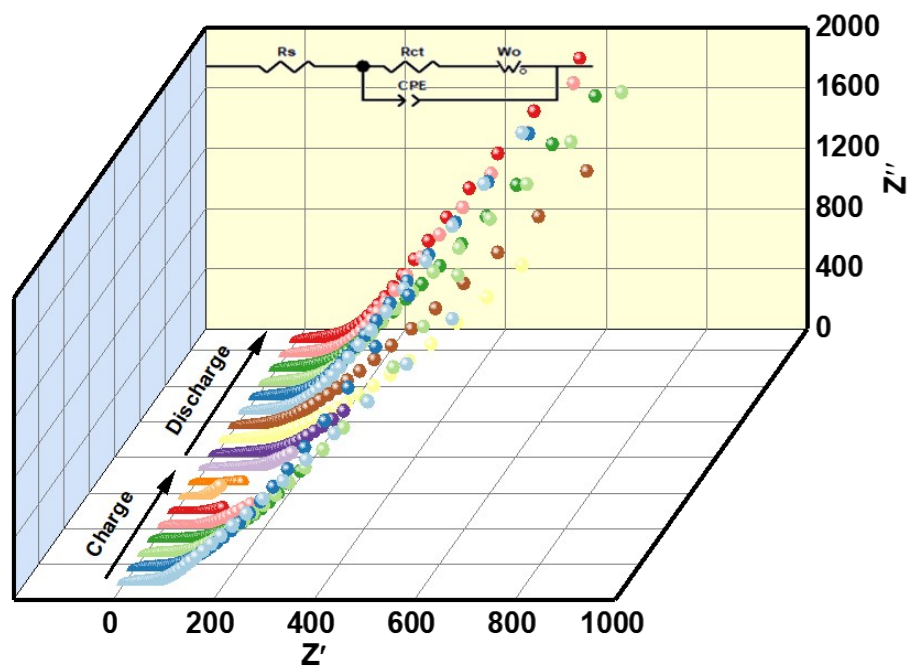

Figure S13. In-situ EIS curves of  $\text{K}_4$ .

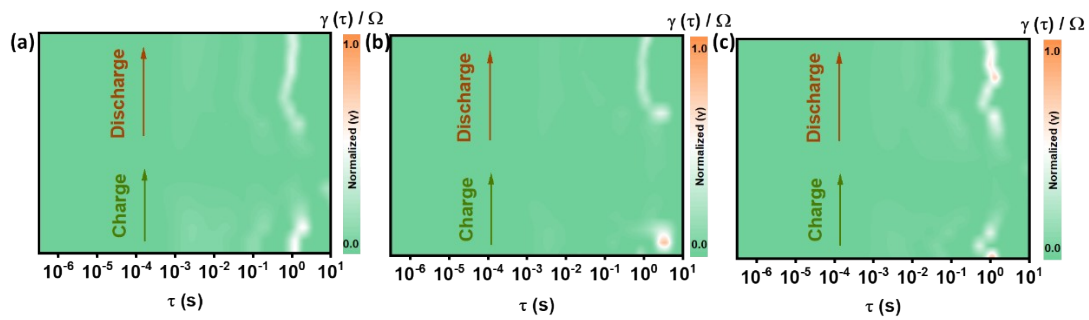

Figure S14. DRT results of (a)  $\text{Na}_4$ , (b)  $\text{K}_3$ , and (c)  $\text{K}_4$ .

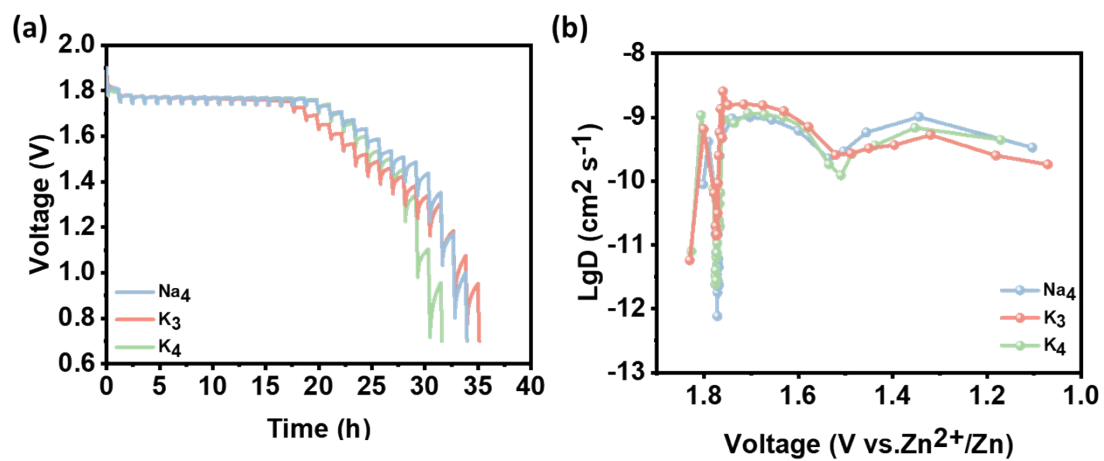

Figure S15. (a) GITT curves and (b) the calculated Zn<sup>2+</sup> diffusion coefficients.

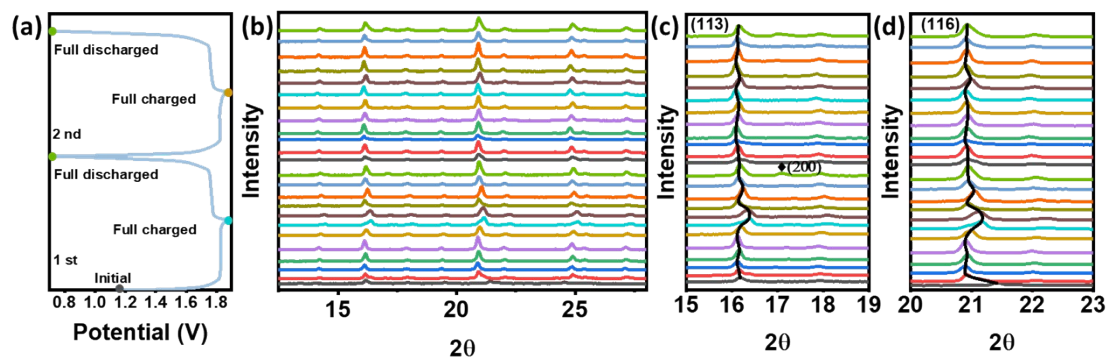

Figure S16. (a) GCD curve and (b-d) ex-situ XRD patterns of  $\text{Na}_4$  at different states during the first two cycles.

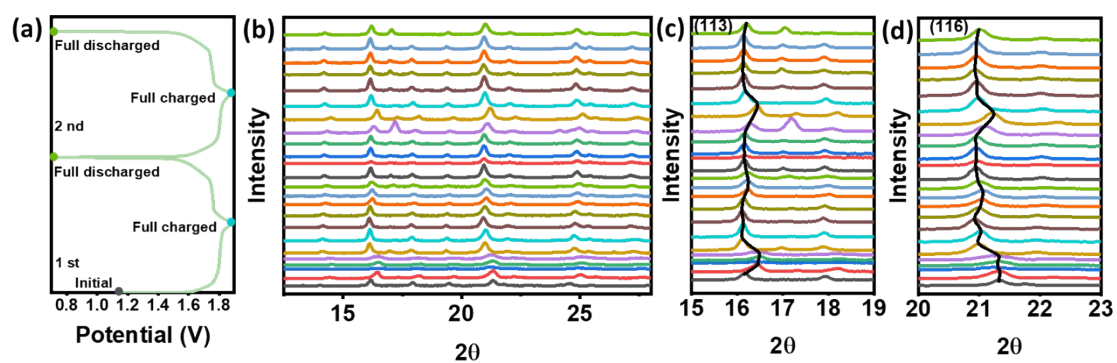

Figure S17. (a) GCD curve and (b-d) ex-situ XRD patterns of  $\text{K}_4$  at different states during the first two cycles.



## Supplementary Tables

Table S1. Detailed structural information of the Na<sub>4</sub> sample after Rietveld refinement.

Na<sub>4</sub>. Space group R-3c, a=b=12.47846 Å, c=32.95311 Å, and  $\alpha=\beta=90^\circ$ ,  $\gamma=120^\circ$ ,  
V= 4443.744 Å<sup>3</sup>. R<sub>wp</sub>=6.1%.

| Atom | x        | y       | z       |
|------|----------|---------|---------|
| Na1  | 0.3504   | 0.30629 | 0.3     |
| Zn1  | 0.29063  | 0       | 0.25    |
| Fe1  | 0        | 0       | 0.14802 |
| C1   | -0.01939 | 0.18106 | 1       |
| C2   | 0.21481  | 0.21714 | 1       |
| N1   | -0.02356 | 0.20625 | 1       |
| N2   | 0.14385  | 0.23694 | 1       |
| O1   | 0.23177  | 0.28654 | 0.17    |
| O2   | 0.2441   | 0.34011 | 0.15    |
| O3   | 0.39194  | 0.31611 | 0.28    |
| O4   | 0.36215  | 0.30109 | 0.56    |
| O5   | 0.3102   | 0.2774  | 0.4     |

Table S2. Detailed structural information of the K<sub>3</sub> sample after Rietveld refinement.

K<sub>3</sub>. Space group R-3c, a=b=12.54776 Å, c=32.83652 Å, and  $\alpha=\beta=90^\circ$ ,  $\gamma=120^\circ$ ,  
V=4477.343 Å<sup>3</sup>. R<sub>wp</sub>=9.06%.

| Atom | x       | y       | z       |
|------|---------|---------|---------|
| Zn1  | 0       | 0.29511 | 0.75    |
| Fe1  | 0       | 0       | 0.14695 |
| C1   | 0.02613 | 0.90449 | 0.18158 |
| C2   | 0.01369 | 0.13415 | 0.37143 |
| N1   | 0.04525 | 0.23969 | 0.71889 |

|    |         |        |         |
|----|---------|--------|---------|
| N2 | 0.30649 | 0.1576 | 0.47716 |
|----|---------|--------|---------|

Table S3. Detailed structural information of the K<sub>4</sub> sample after Rietveld refinement.

K<sub>4</sub>. Space group R-3c, a=b=12.57255 Å, c= 32.14694 Å, and α=β=90°, γ=120°, V=4400.653 Å<sup>3</sup>. R<sub>wp</sub>=6.55%.

| Atom | x        | y        | z       |
|------|----------|----------|---------|
| K1   | 0.0188   | 0.20324  | 0.05928 |
| Zn1  | 0.28567  | 0        | 0.25    |
| Fe1  | 0        | 0        | 0.14675 |
| C1   | -0.00338 | 0.11652  | 0.17089 |
| C2   | 0.14614  | 0.11962  | 0.11765 |
| N1   | 0.06681  | 0.31386  | 0.22495 |
| N2   | 0.2245   | 0.02418  | 0.01633 |
| O1   | 0.40424  | 0.01171  | 0.04176 |
| O2   | 0.22486  | 0.02204  | 0.00734 |
| O3   | 0.07463  | -0.03409 | 0.01506 |

Table S4. Mass ratio of each atom in Na<sub>4</sub>, K<sub>3</sub> and K<sub>4</sub> obtained by ICP-OES and elemental analysis.

| Samples         | Elements | Weight (wt.%) | Atomic ratio | Chemical formula                                                               |
|-----------------|----------|---------------|--------------|--------------------------------------------------------------------------------|
| Na <sub>4</sub> | Na       | 4.58          | 0.83         | Na <sub>0.83</sub> Zn <sub>1.5</sub> Fe(CN) <sub>6</sub> □4.29H <sub>2</sub> O |
|                 | Zn       | 23.8          | 1.5          |                                                                                |
|                 | Fe       | 13.2          | 1            |                                                                                |
| K <sub>3</sub>  | K        | 0.97          | 0.1          | K <sub>0.1</sub> Zn <sub>1.54</sub> Fe(CN) <sub>6</sub> □1.95H <sub>2</sub> O  |
|                 | Zn       | 26.4          | 1.54         |                                                                                |
|                 | Fe       | 14.7          | 1            |                                                                                |
| K <sub>4</sub>  | K        | 7.44          | 0.79         | K <sub>0.79</sub> Zn <sub>1.54</sub> Fe(CN) <sub>6</sub> □3.63H <sub>2</sub> O |
|                 | Zn       | 24.5          | 1.54         |                                                                                |
|                 | Fe       | 13.3          | 1            |                                                                                |

Table S5. Comparison of Key Characteristics of Na<sub>4</sub>, K<sub>3</sub>, and K<sub>4</sub>.

| Key Characteristics                                            | Na <sub>4</sub>                   | K <sub>3</sub>                                     | K <sub>4</sub>                    |
|----------------------------------------------------------------|-----------------------------------|----------------------------------------------------|-----------------------------------|
| Crystal structure                                              | R-3c                              | R-3c                                               | R-3c                              |
| Alkali metal ion content (per formula unit)                    | Na <sup>+</sup> = 0.83            | K <sup>+</sup> = 0.1                               | K <sup>+</sup> = 0.79             |
| Crystalline water content (%)                                  | 19.00                             | 10.01                                              | 16.09                             |
| Fe valence state                                               | Fe <sup>2+</sup> (single valence) | Fe <sup>2+</sup> /Fe <sup>3+</sup> (mixed valence) | Fe <sup>2+</sup> (single valence) |
| Rate capacity (mAh g <sup>-1</sup> , 1000 mA g <sup>-1</sup> ) | 22                                | 35                                                 | 33                                |
| Capacity retention                                             | /                                 | 70.5                                               | /                                 |

|                            |                       |                |                    |
|----------------------------|-----------------------|----------------|--------------------|
| after 800 cycles (%)       |                       |                |                    |
| Zn <sup>2+</sup> migration | 1.46                  | 0.65           | 1.30               |
| aenergy barrier (eV)       |                       |                |                    |
| Phase transition           | Irreversible          | Reversible (no | Irreversible       |
| during cycling             | (monoclinic<br>phase) | phase change)  | (monoclinic phase) |

---
